# Supplementary material for: Inhibition of KIF23 Alleviates IPAH by Targeting Pyroptosis and Proliferation of PASMCs
Source: MDPI journal article supplement (doi:10.3390/ijms23084436), 2022-04-18
Supplement: s1 [file s1]

**supplement files****Table S1.** Characteristics of datasets in this study

| Dataset   | Platform | Date | Sample |        | Subject | Species      |
|-----------|----------|------|--------|--------|---------|--------------|
|           |          |      | PAH    | Normal |         |              |
| GSE144274 | GPL20301 | 2020 | 4      | 4      | PASMCs  | Homo sapiens |
| GSE168905 | GPL16791 | 2021 | 7      | 9      | PASMCs  | Homo sapiens |

**Table S2.** The list of 56 pyroptosis-related genes.

| <b>Gene</b> | <b>Gene symbol</b>                         | <b>Gene</b> | <b>Gene symbol</b>                                     |
|-------------|--------------------------------------------|-------------|--------------------------------------------------------|
| AIM2        | absent in melanoma 2                       | GZMB        | granzyme B                                             |
| BAK1        | BCL2 antagonist/killer 1                   | HDAC6       | histone deacetylase 6                                  |
| BAX         | BCL2 associated X, apoptosis regulator     | HMGB1       | high mobility group box 1                              |
| BNIP3       | BCL2 interacting protein 3                 | IL18        | interleukin 18                                         |
| CARD8       | caspase recruitment domain family member 8 | IL1B        | interleukin 1 beta                                     |
| CASP1       | caspase 1                                  | IL6         | interleukin 6                                          |
| CASP10      | caspase 10                                 | IRF7        | interferon regulatory factor 7                         |
| CASP11      | caspase 11                                 | NEXN        | nexilin F-actin binding protein                        |
| CASP3       | caspase 3                                  | NLRC4       | NLR family CARD domain containing 4                    |
| CASP4       | caspase 4                                  | NLRP1       | NLR family pyrin domain containing 1                   |
| CASP5       | caspase 5                                  | NLRP12      | NLR family pyrin domain containing 12                  |
| CASP6       | caspase 6                                  | NLRP2       | NLR family pyrin domain containing 2                   |
| CASP7       | caspase 7                                  | NLRP3       | NLR family pyrin domain containing 3                   |
| CASP8       | caspase 8                                  | NLRP6       | NLR family pyrin domain containing 6                   |
| CASP9       | caspase 9                                  | NLRP7       | NLR family pyrin domain containing 7                   |
| CD147       | basigin                                    | NOD1        | nucleotide binding oligomerization domain containing 1 |
| CD274       | pd1l Programmed cell death 1 ligand 1      | NOD2        | nucleotide binding oligomerization domain containing 2 |
| CRTAC1      | cartilage acidic protein 1                 | PDCD6       | programmed cell death 6                                |
| ELANE       | elastase, neutrophil expressed             | PJVK        | pejvakin                                               |
| FGF21       | fibroblast growth factor 21                | PLCG1       | phospholipase C gamma 1                                |
| FOXO3       | forkhead box O3                            | PRKACA      | protein kinase cAMP-activated catalytic subunit alpha  |
| GPX4        | glutathione peroxidase 4                   | PYCARD      | PYD and CARD domain containing                         |
| GSDMA       | gasdermin A                                | SCAF11      | SR-related CTD associated factor 11                    |
| GSDMB       | gasdermin B                                | TET2        | tet methylcytosine dioxygenase 2                       |
| GSDMC       | gasdermin C                                | TIRAP       | TIR domain containing adaptor protein                  |
| GSDMD       | gasdermin D                                | TLR4        | toll like receptor 4                                   |
| GSDME       | gasdermin E                                | TNF         | tumor necrosis factor                                  |
| GZMA        | granzyme A                                 | TXINP       | thioredoxin interacting protein                        |

**Table S3 The gene number of each module**

|           |               |             |             |              |          |
|-----------|---------------|-------------|-------------|--------------|----------|
| black     | blue          | brown       | cyan        | darkgreen    | darkgrey |
| 539       | 1168          | 894         | 336         | 173          | 143      |
| darkred   | darkturquoise | green       | greenyellow | grey         | grey60   |
| 179       | 155           | 706         | 383         | 4            | 314      |
| lightcyan | lightgreen    | lightyellow | magenta     | midnightblue | pink     |
| 332       | 284           | 253         | 858         | 334          | 462      |
| red       | royalblue     | salmon      | tan         | turquoise    | yellow   |
| 614       | 218           | 338         | 375         | 3125         | 783      |

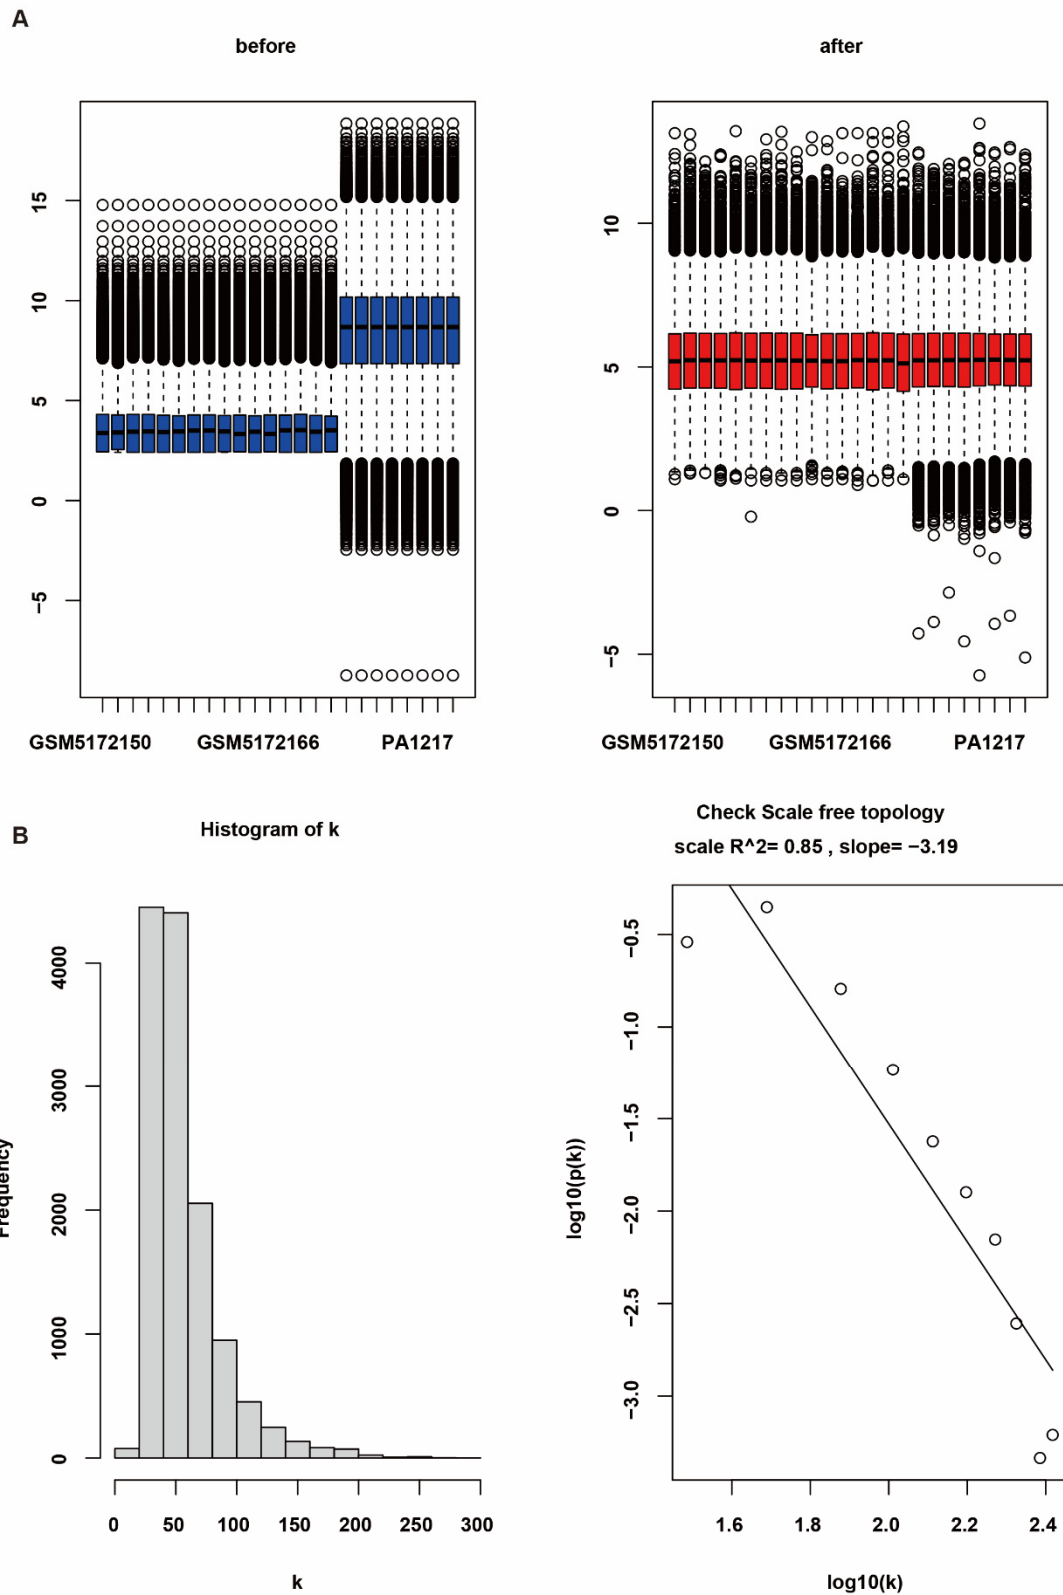

**Figure S1** The boxplot of all samples before and after remove batch effect (A) and Scale-free topology when soft-thresholding power  $\beta = 5$ .
